# Supplementary material
Source: PubMed Central journal article supplement (PMC3190937)
Supplement: supp_M111.248401_jbc.M111.248401-2.pdf [file supp_M111.248401_jbc.M111.248401-2.pdf]

## Supplementary Figure-2

**A**

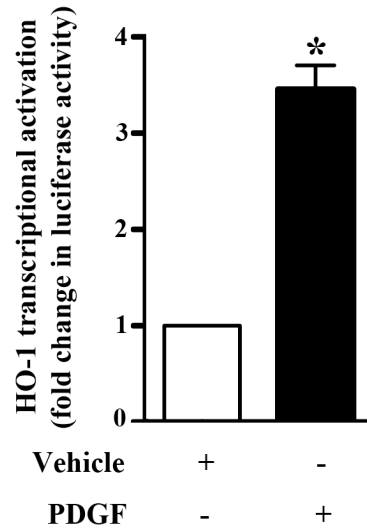

**B**

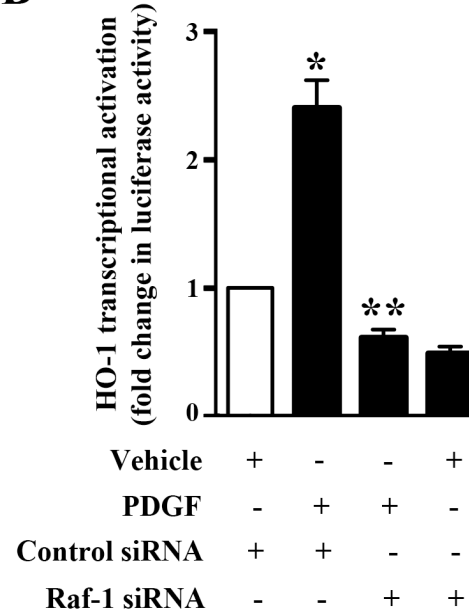

PDGF induces transcriptional activation of HO-1, and Raf-1 is an intermediary molecule in the process: **A**, Caki-1 cells were transfected with the HO-1 promoter-luciferase construct (0.5  $\mu$ g) in the presence of PDGF or vehicle. **B**, Caki-1 cells were transfected with either Raf-1 siRNA (50 nM) or control siRNA. Following 24 hour of siRNA transfection, the cells were transfected with HO-1 promoter-luciferase construct (0.5  $\mu$ g) in the presence of PDGF or vehicle. **A & B**, the cells were harvested 48 hour after plasmid transfection and fold change in luciferase activity was calculated as relative luciferase counts from each group of cells compared with that of vehicle treated (**A**) or vehicle-treated and control siRNA-transfected (**B**) cells. Results are representative of two independent experiments. Columns, average of triplicate readings; error bars, SD. \*,  $p < 0.01$  compared with vehicle-treated, or control siRNA-transfected and vehicle-treated cells; \*\*,  $p < 0.01$  compared with control siRNA-transfected and PDGF-treated cells.
