# Supplementary material
Source: PubMed Central journal article supplement (PMC3190937)
Supplement: supp_M111.248401_jbc.M111.248401-3.pdf [file supp_M111.248401_jbc.M111.248401-3.pdf]

### Supplementary Figure-3

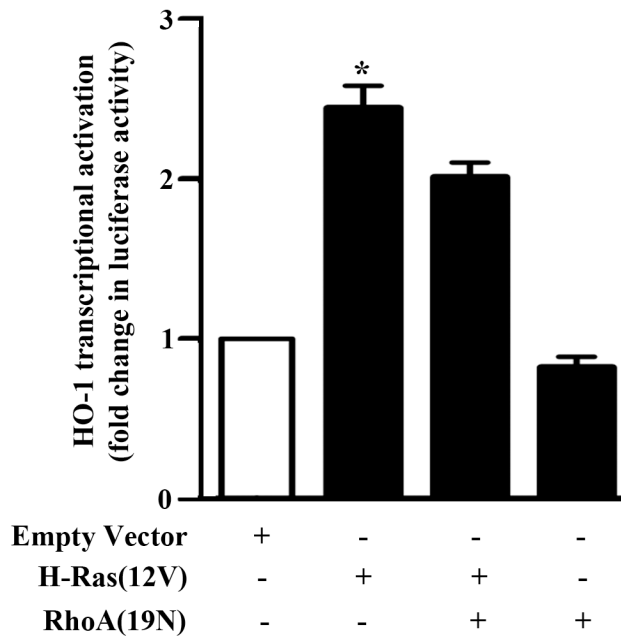

**Effect of dominant-negative RhoA on H-Ras-induced HO-1 transcriptional activation:** 786-0 cells were co-transfected with the HO-1 promoter-luciferase construct (0.5  $\mu$ g) and either different combinations of H-Ras(12V) and RhoA(19N), or the empty expression vector. The cells were harvested after 48 hours, and fold change in luciferase activity was calculated as the relative luciferase counts from each group of cells compared with that of cells transfected with empty vector alone. Results are representative of two independent experiments. Columns, average of triplicate readings ; error bars, SD. \*, P < 0.01 compared with empty vector-transfected cells.
