# Supplementary material
Source: PubMed Central journal article supplement (PMC3190937)
Supplement: supp_M111.248401_jbc.M111.248401-4.pdf [file supp_M111.248401_jbc.M111.248401-4.pdf]

## Supplementary Figure-4

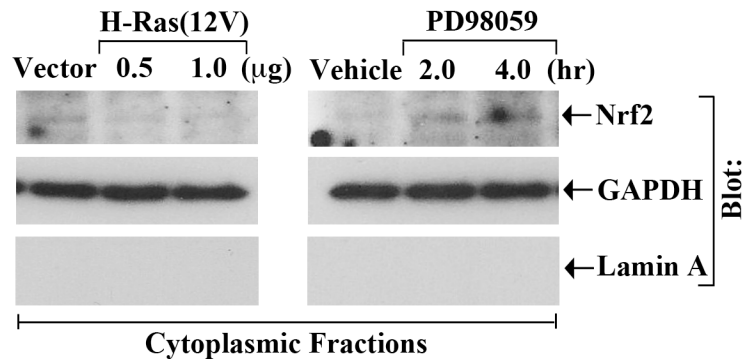

**Activation of H-Ras decreases, while inhibition of ERK increases the cytoplasmic expression of Nrf2:** In left panel, 786-0 cells were transfected (overnight) with either different concentrations of H-Ras(12V) or empty vector; in right panel, 786-0 cells were treated with either PD98059 (50 µM) or the vehicle alone. Cytoplasmic fractions were prepared from these cells, and Western blot analysis was performed using anti-Nrf2 (top panels) to quantitate the expression of Nrf2. The purities of cytoplasmic fractions were determined through Western blot analysis using anti-GAPDH (middle panel) and anti-Lamin A (bottom panel) to quantitate the expression of GAPDH (positive control) and Lamin A (negative control) respectively. Results are representative of three independent experiments.
